# Supplementary material for: Phosphorus-decorated Mo-MXene/CQD hybrid: a 2D/0D architecture for bifunctional electrochemical water splitting
Source: Royal Society of Chemistry journal article supplement (doi:10.1039/d1nr03845a), 2021-01-01
Supplement: d1nr03845a1.pdf [file d1nr03845a1.pdf]

## Electronic Supplementary Information†

For

# Phosphorus-decorated Mo-MXene/CQD hybrid: a 2D/0D architecture for bifunctional electrochemical water splitting

Atanu Panda<sup>a</sup>, Hansang Kim<sup>a\*</sup>

<sup>a</sup> Department of Mechanical Engineering, Gachon University, Gyeonggi-do 13120, Republic of Korea

### Corresponding Authors

\*E-mail: [hskim70@gachon.ac.kr](mailto:hskim70@gachon.ac.kr)

### Chemicals:

MAX phase of  $\text{Mo}_2\text{AlC}_2$  were purchased from China (Beijing Dingsheng Brothers Technology

Co., Ltd). Phloroglucinol, Lithium fluoride (LiF), Monosodium phosphate ( $\text{NaH}_2\text{PO}_4$ ), potassium hydroxide (KOH), 10% Nafion solution were purchased from Sigma- Aldrich (Canada) and used as received. High-purity Sulfuric acid, Sodium sulfate, hydrochloric acid was purchased from Sigma- Aldrich (Canada). Pure water was obtained using a NanoPure system and was used in the preparation of all solutions. Electrochemical experiments were carried out in 0.5 M ( $\sim\text{pH } 0$ )  $\text{H}_2\text{SO}_4$  solution.

### **Characterizations:**

The wide-angle powder X-ray diffraction (XRD) measurement was carried out on a Rigaku X-ray diffractometer (X-ray generator output: 3KW (target material Cu), 20-60kW, 2-60mA) with scan rate of  $4^\circ/\text{min}$ . The morphology of the catalysts was observed by field-emission scanning electron microscopy (FESEM) on a JEOL (JSM-7500F, 1.0nm at 15kV). The morphology of the sample was acquired on a Tecnai 2010 (Japan) transmission electron microscope (TEM) at 300 kV with resolution: 1.4Å (Fully embedded High Angle Annular Dark Field (HAADF) detector-HR STEM resolution). The Raman spectroscopy were analysed on Witec (Alpha 300M+) instrument fitted with 600 nm wavelength. X-ray photoelectron spectroscopy (XPS) was analyzed on an Multilab-2000 X-ray photoelectron spectrometer (Al K Alpha, Lens Mode-LAXPS, step size 0.100 eV). The solid-state NMR spectroscopy were performed by using AVANCE III HD (400 MHz, Bruker, Germany, Spinning rate: 14 kHz.). All electrochemical experiments were performed in compact type electrochemical workstation ZIVE SP1 equipped with Smart Manager (SM) Software package.

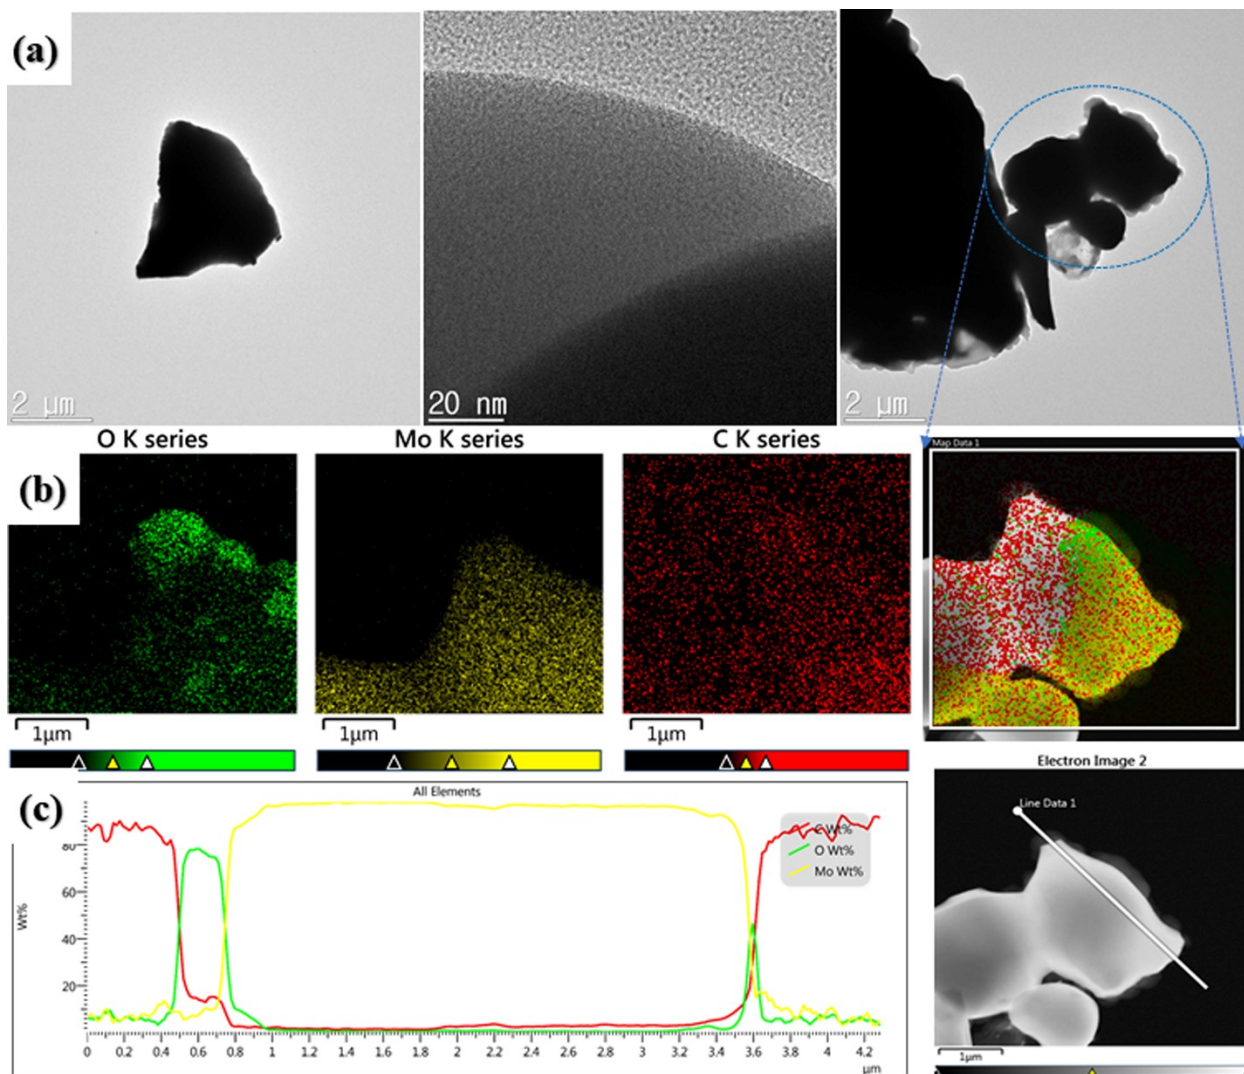

**Fig. S1.** TEM and elemental mapping of 2D Mo-MXene sheet.

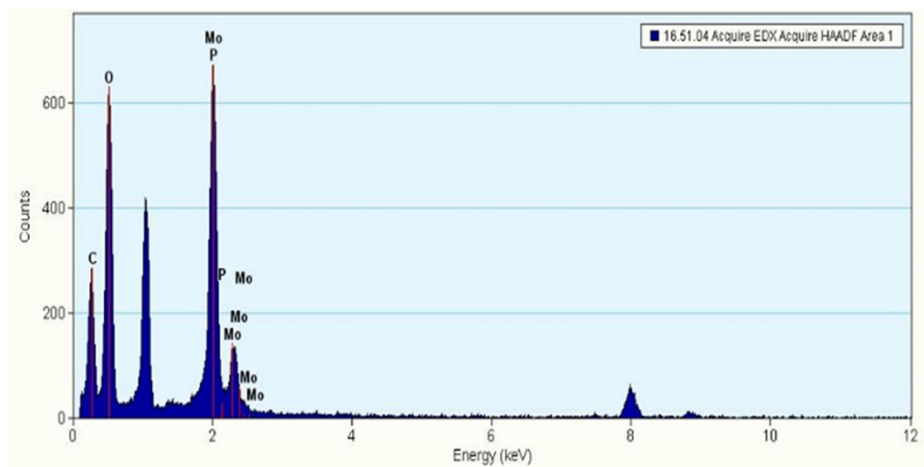

**Fig. S2.** EDAX analysis of Mo-MX/C/P hybrid.

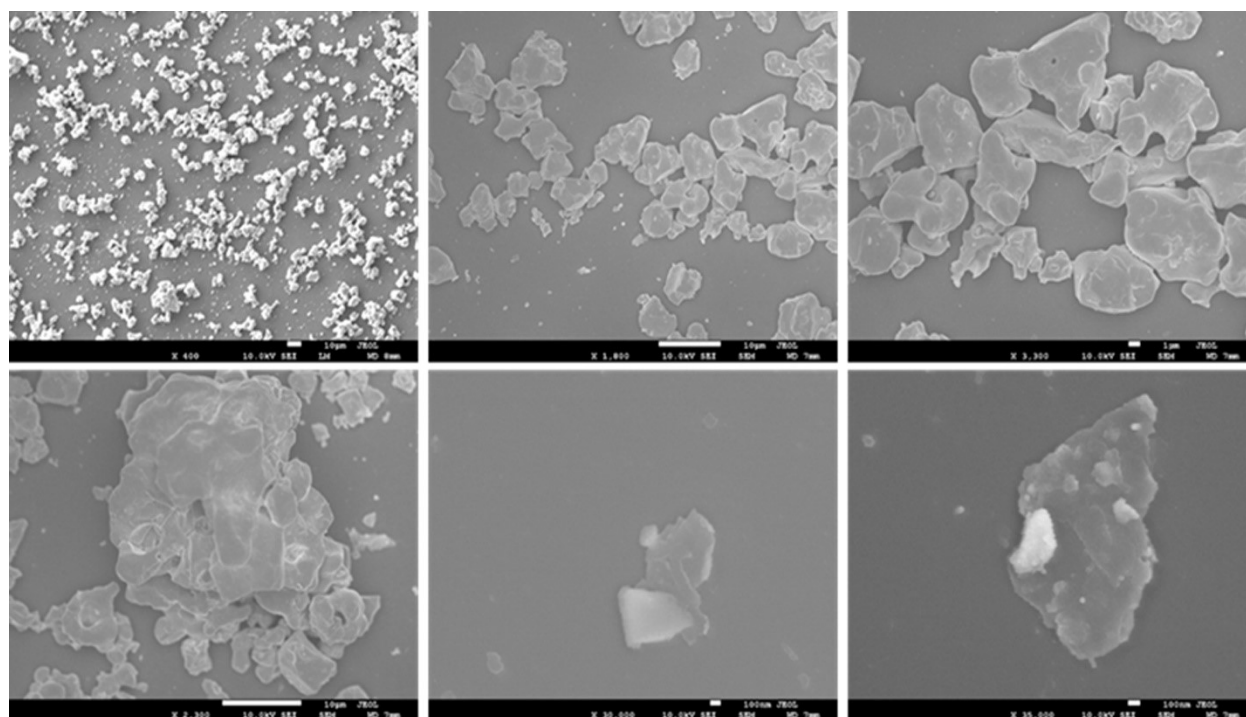

**Fig. S3.** Fe-SEM of 2D Mo-MXene sheet.

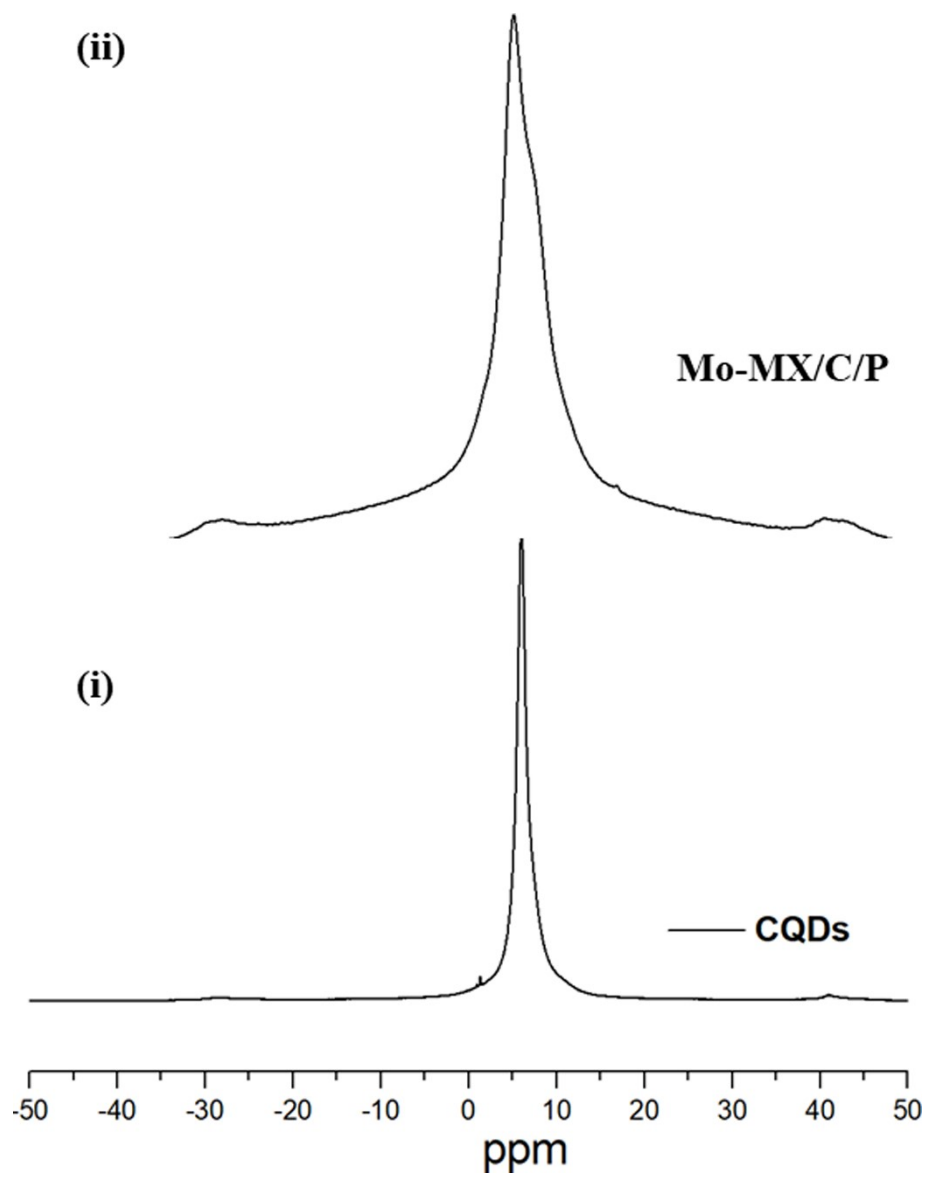

**Fig. S4.** <sup>1</sup>H proton NMR CQDs and Mo-MX/C/P hybrid.

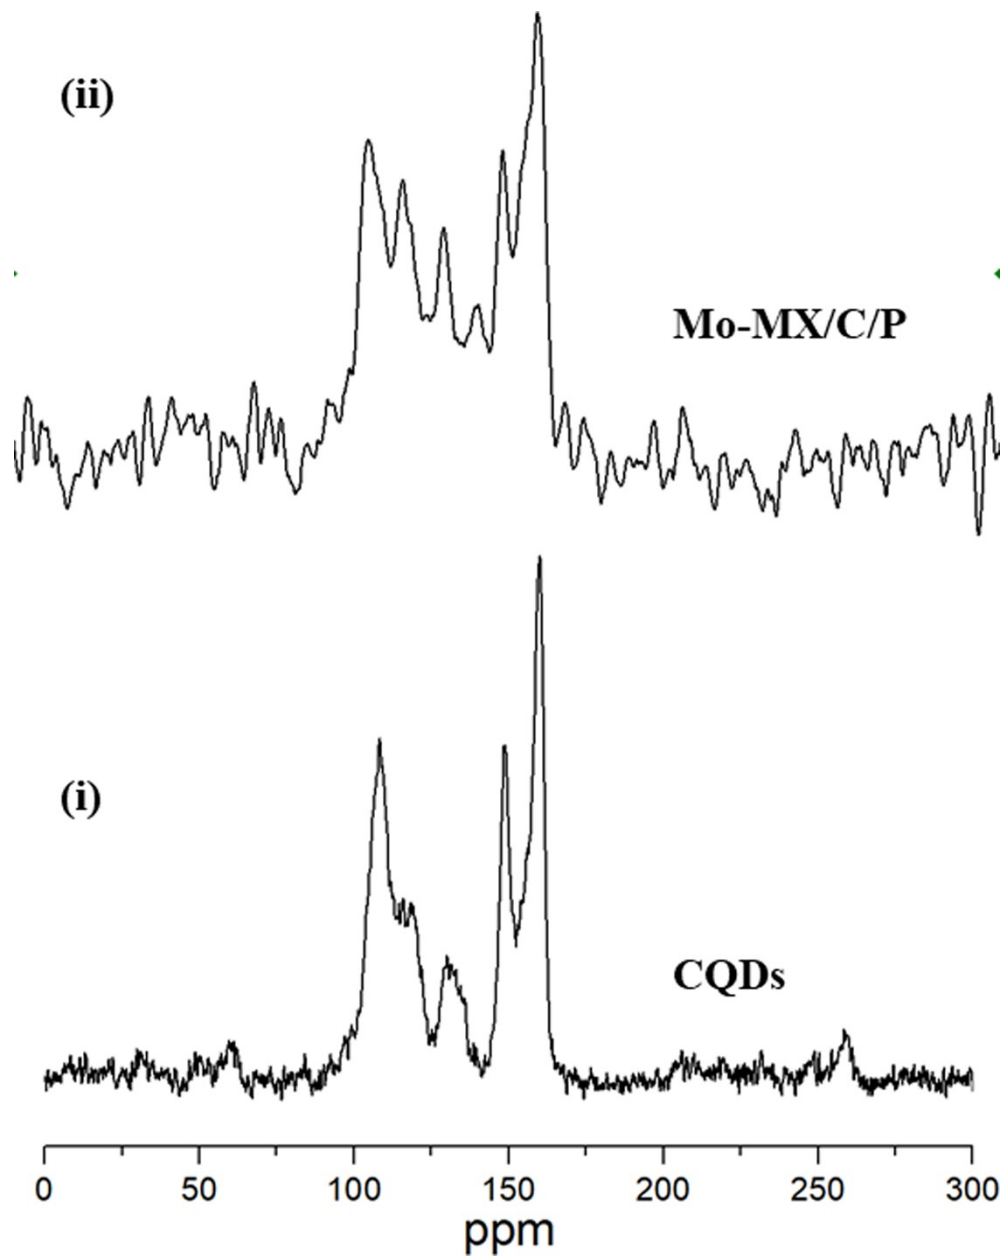

Fig. S5.  $^{13}\text{C}$  NMR CQDs and Mo-MX/C/P hybrid.

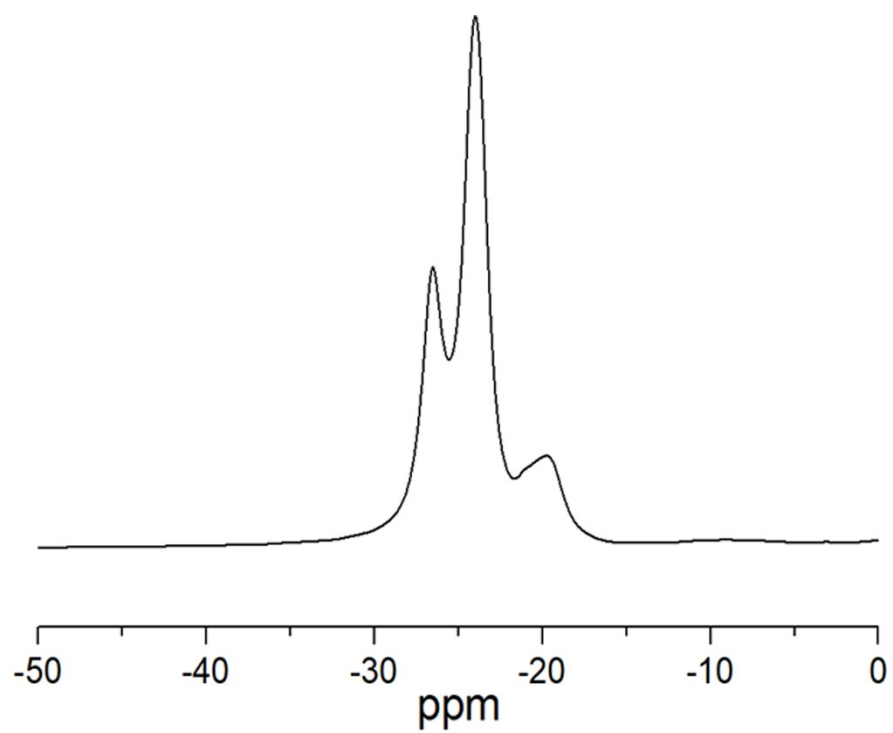

**Fig. S6.**  $^{31}\text{P}$  NMR of Mo-MX/C/P hybrid.

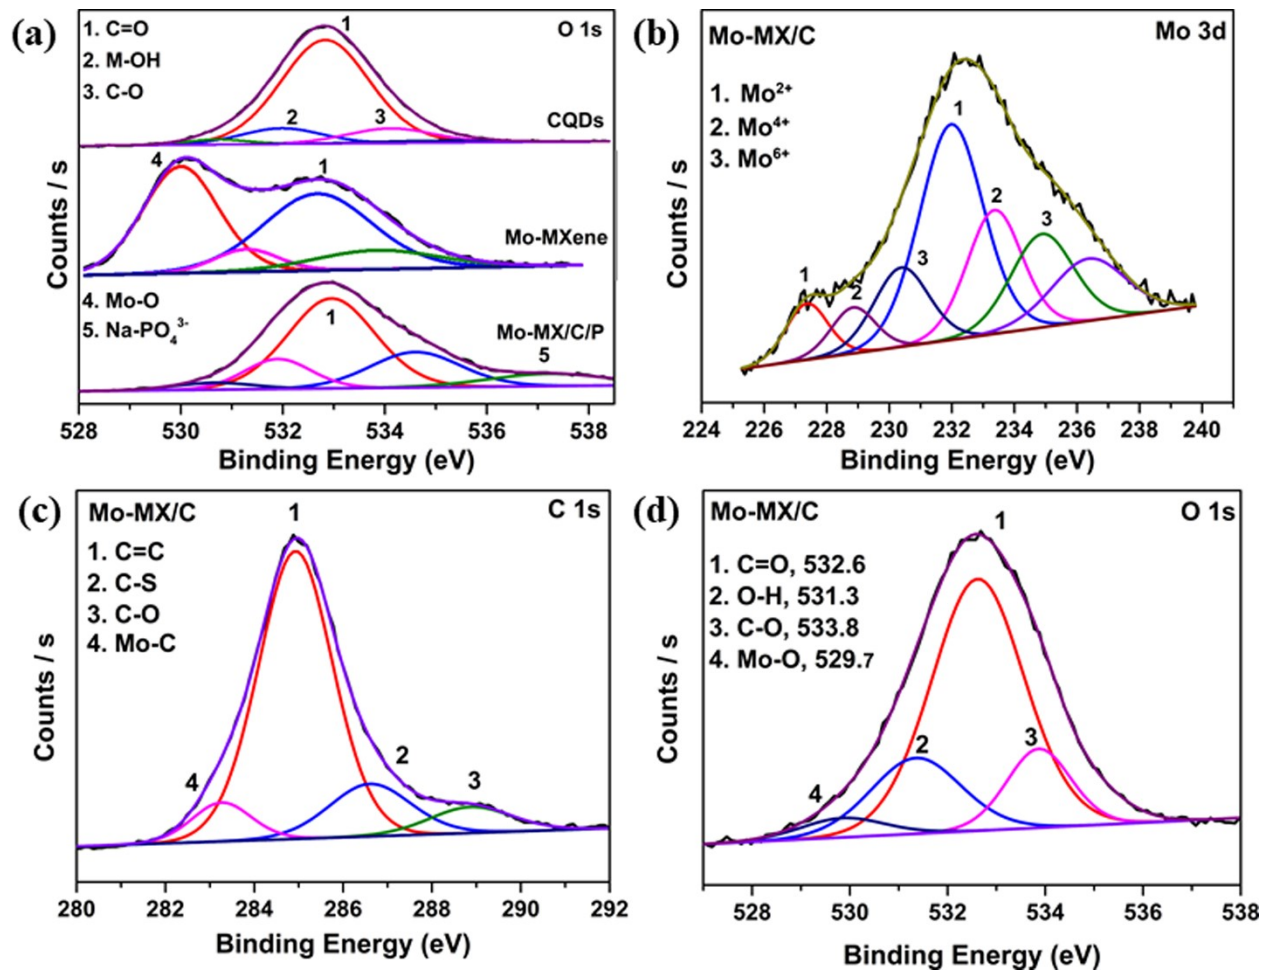

**Fig. S7.** XPS survey spectra of (a) O1s for CQDs, Mo-MXene and Mo-MX/C/P; ((b)–(d)) High-resolution normalized XPS spectra for the following: (b) Mo 3d, (c) C 1s, (d) O 1s of Mo-MX/C hybrid.



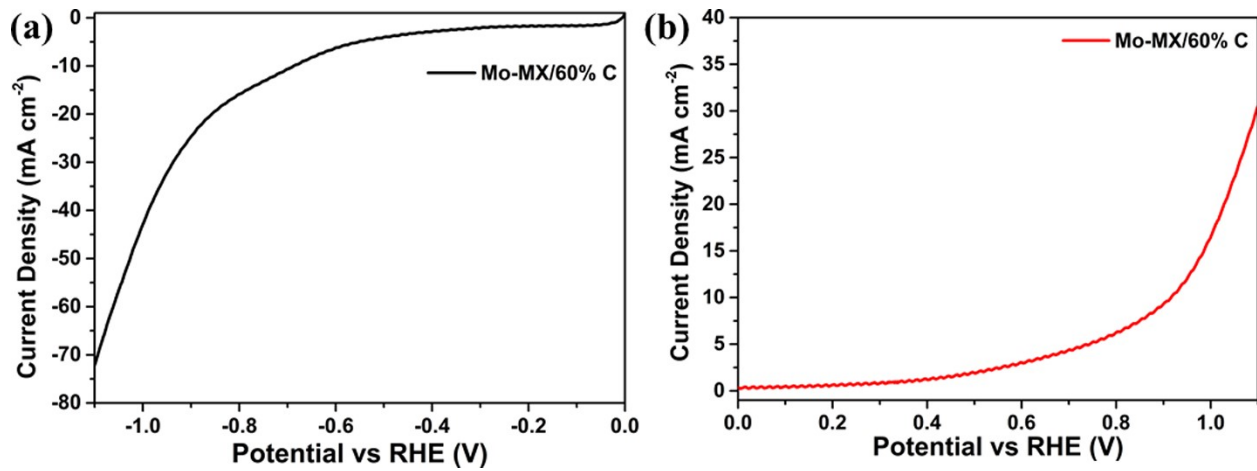

Fig. S8. (a) HER polarization curves, (b) OER polarization curves of Mo-MX/60 % C.

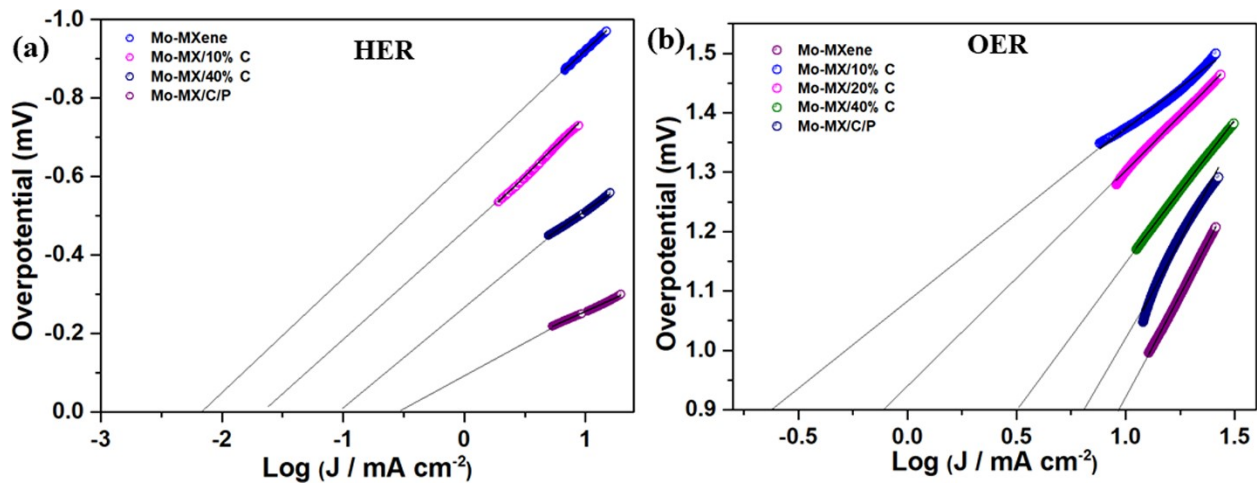

Fig. S9. The exchange current density ( $j_0$ ) for (a) HER and (b) OER.

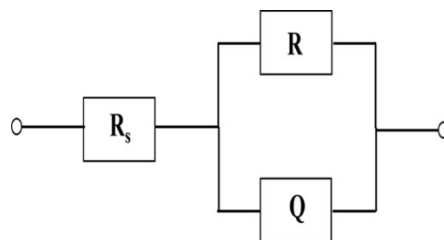

Fig. S10. Fitted electronic circuit model obtained for EIS spectroscopy by using ZAMAN impedance electrochemical software.

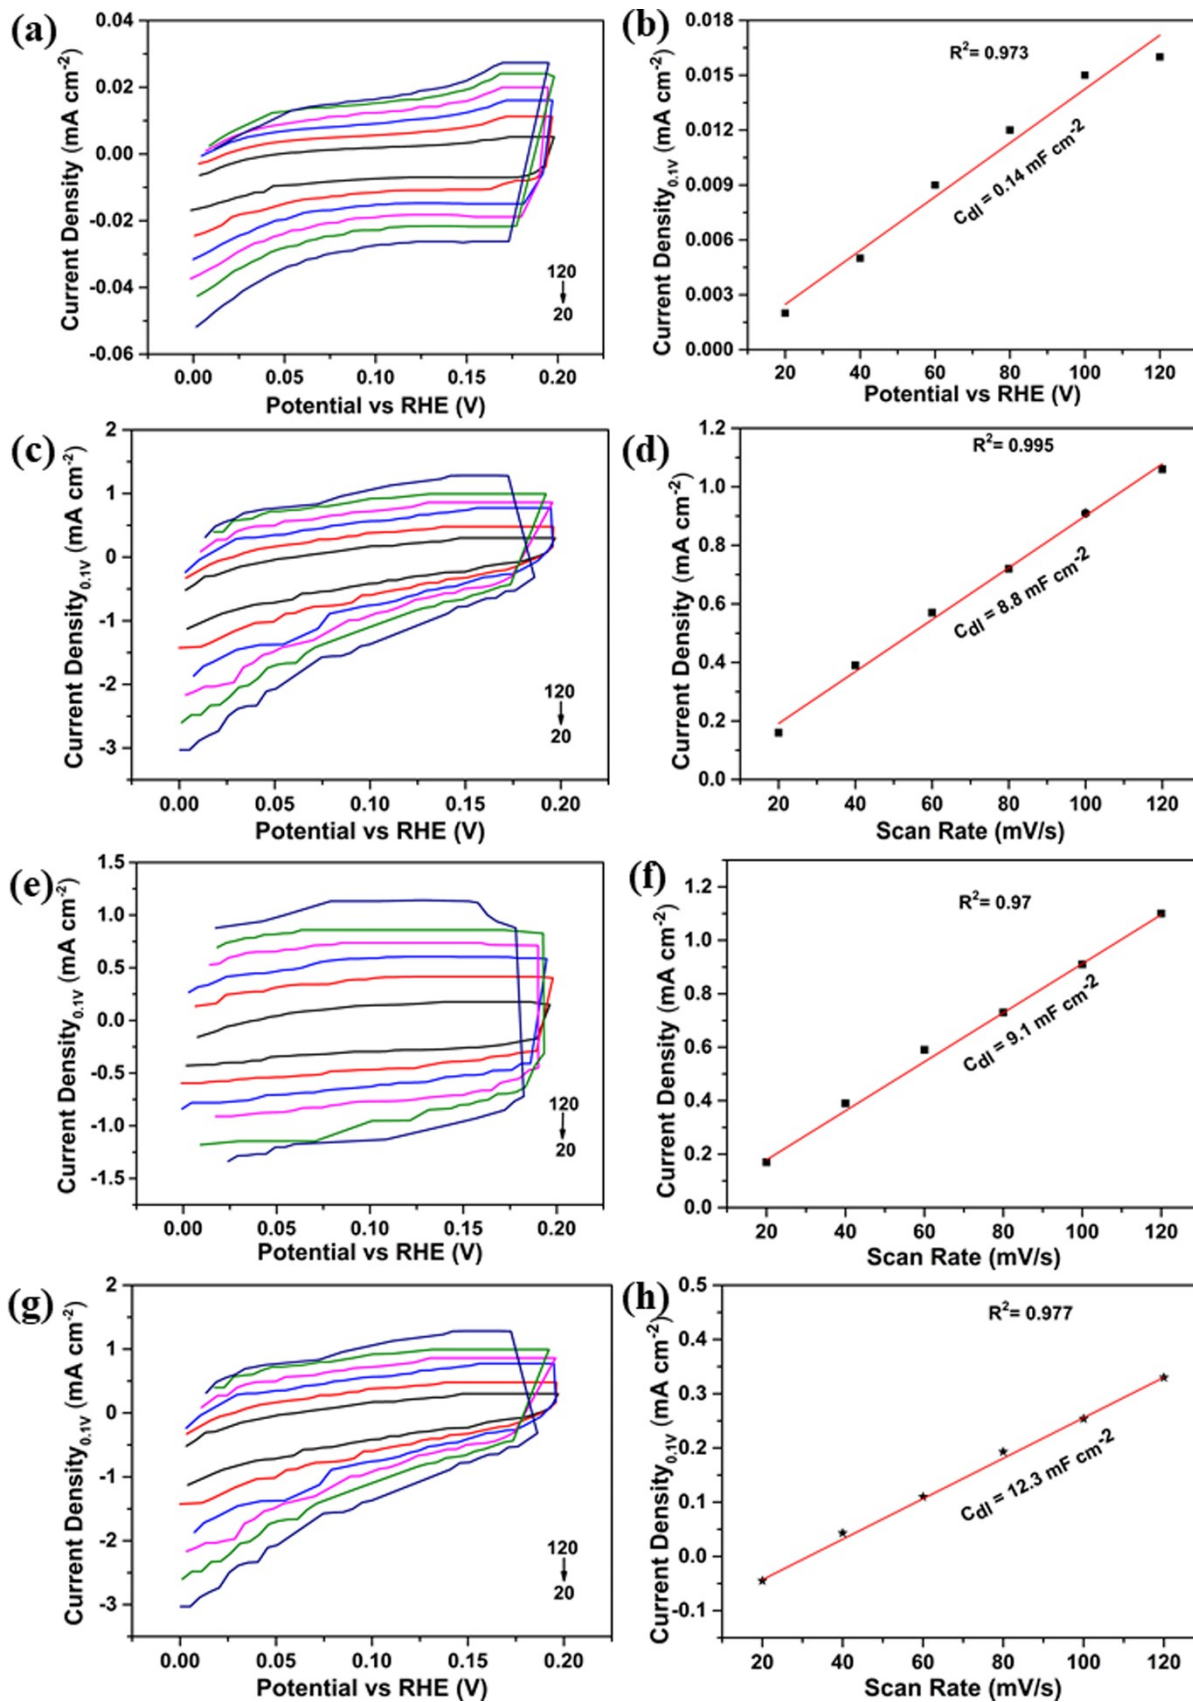

**Fig. S11.** Double layer capacitance and respective CVs of (a) bare CPE electrode, (c) CQDs, (Mo-MXene), (e) Mo-MX/C and (g) Mo-MX/C/P hybrid from scan rate 20-120 mV s<sup>-1</sup>.

The electrochemical surface area (ECSA) was calculated. using the following formula:

$$ECSA = C_{dl} / C_s,$$

Where  $C_{dl}$  is double layer capacitance of electrode-electrolyte interaction.  $C_s$  is the specific capacitance and equal to 0.040 mF cm<sup>-2</sup>. The roughness factor (RF) was calculated using the following relationship.

$$RF = ECSA / \text{geometric area of the electrode}$$

Where electrode geometric area is 1 cm<sup>2</sup>.

**Table S1:** Summarization of electrochemical active surface area.

| Catalysts | Double layer capacitance ( $C_{dl}$ ) | Electrochemical active surface area (ECSA) | Roughness factor (RF) |
|-----------|---------------------------------------|--------------------------------------------|-----------------------|
| CPE       | 0.14 mF cm <sup>-2</sup>              | 3.5                                        | 3.5                   |
| CQDs      | 8.8 mF cm <sup>-2</sup>               | 220                                        | 220                   |
| Mo-MXene  | 9.1 mF cm <sup>-2</sup>               | 227                                        | 227                   |
| Mo-MX/C   | 12.3 mF cm <sup>-2</sup>              | 307                                        | 307                   |
| Mo-MX/C/P | 65.1 mF cm <sup>-2</sup>              | 1627                                       | 1627                  |

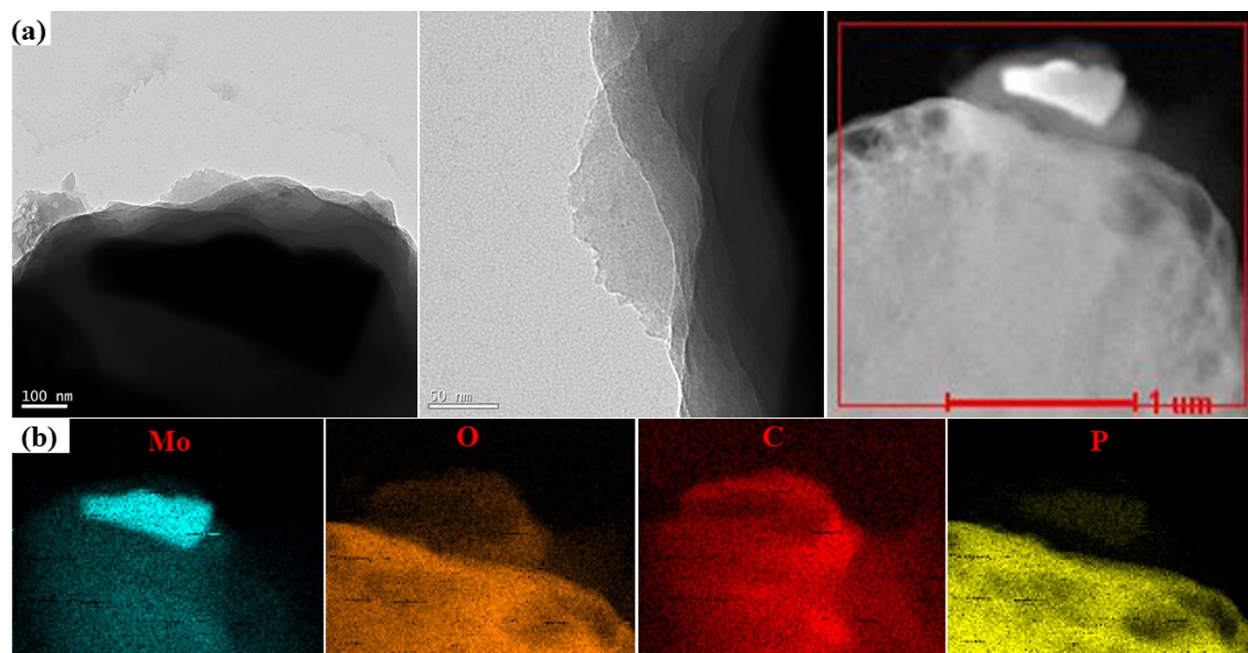

**Fig. S12.** (a) TEM and HR-TEM, (b) elemental mapping of Mo-MX/C/P hybrid after 10 hours durability test in 0.5 M H<sub>2</sub>SO<sub>4</sub> solution.

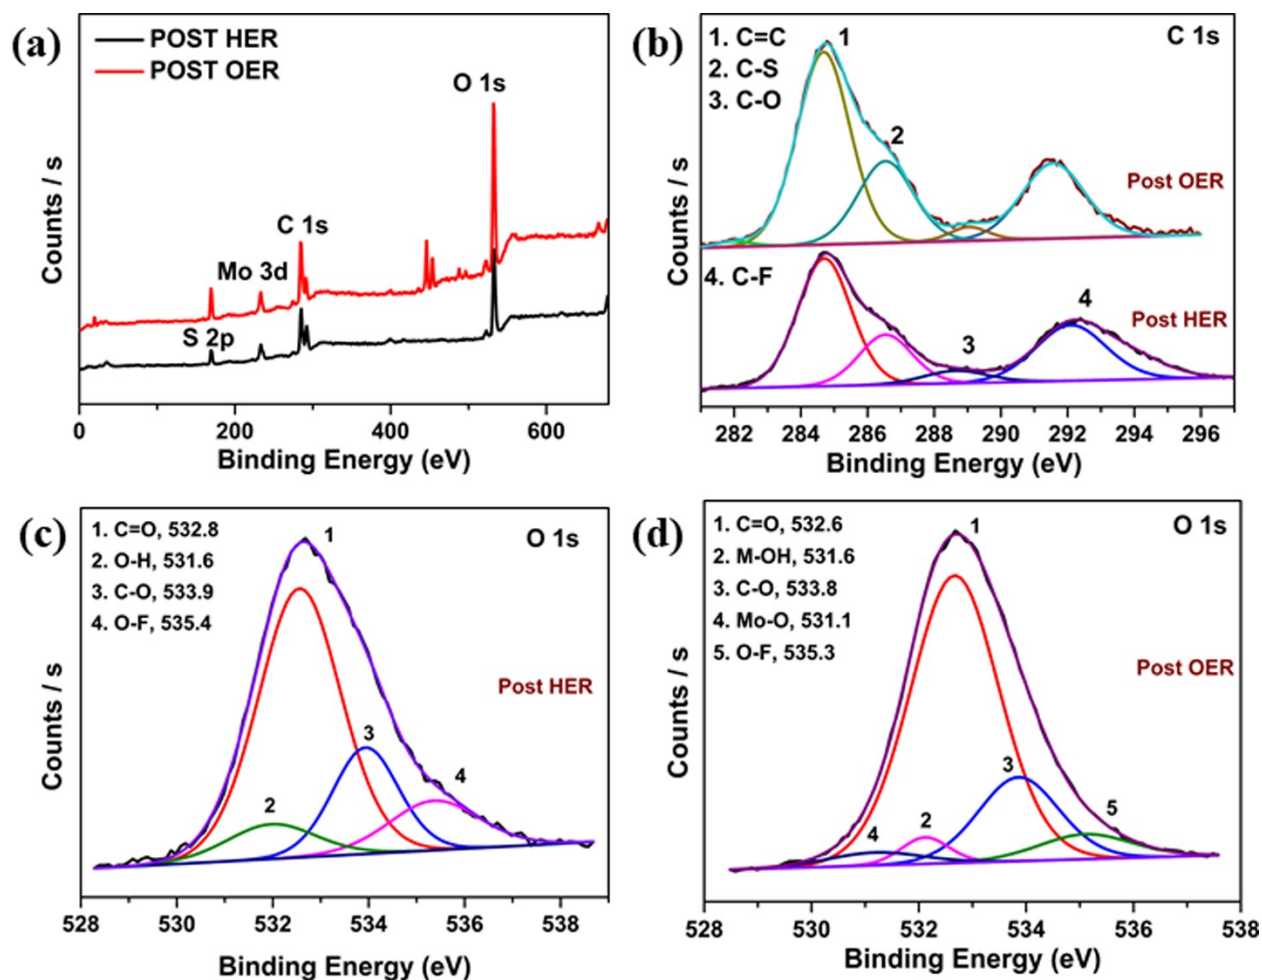

**Fig. S13.** (a) XPS survey spectra. ((b)–(d)) High-resolution normalized XPS spectra for the following: (b) C 1s, (c) O 1s after HER, (d) O 1s after OER of Mo-MX/C/P hybrid.

Note: The XPS of post water electrolysis were done by using FTO as working electrode.

**Table S2.** Summary of Mo-based catalysts for electrochemical HER.

| Catalyst | Loading amount<br>mg/cm <sup>2</sup> | Current density<br>(mA cm <sup>-2</sup> ) | Overpotential<br>(mV) | electrolyte                             | Reference                                         |
|----------|--------------------------------------|-------------------------------------------|-----------------------|-----------------------------------------|---------------------------------------------------|
| MoN      | 0.285                                | 38.5                                      | 300                   | 0.5 M<br>H <sub>2</sub> SO <sub>4</sub> | <i>Chem. Sci.</i> 2014, 5,<br>4615.               |
| MoB      | 2.5                                  | 17                                        | 250                   | 0.5 M<br>H <sub>2</sub> SO <sub>4</sub> | <i>Angew. Chem. Int.<br/>Ed.</i> 2012, 51, 12703. |

|                                                                            |      |     |     |                                      |                                                    |
|----------------------------------------------------------------------------|------|-----|-----|--------------------------------------|----------------------------------------------------|
| (MoS <sub>2</sub> ) <sub>0.6</sub> (SnO <sub>2</sub> ) <sub>0.4</sub> /rGO | 0.27 | 10  | 263 | 0.5 M H <sub>2</sub> SO <sub>4</sub> | <i>ACS Appl. Mater. Interfaces</i> .2017, 9, 8065. |
| Mo <sub>0.21</sub> W <sub>0.79</sub> S <sub>2</sub>                        | NA   | 10  | 346 | 0.5 M H <sub>2</sub> SO <sub>4</sub> | <i>Adv. Mater. Interfaces</i> 2015, 2, 1500041     |
| MoP/CF                                                                     | NA   | 10  | 200 | 0.5 M H <sub>2</sub> SO <sub>4</sub> | <i>Appl. Catal. B-Environ.</i> 2015, 164, 144.     |
| MoS <sub>1.5</sub> Se <sub>0.5</sub>                                       | 0.18 | 10  | 383 | 0.5 M H <sub>2</sub> SO <sub>4</sub> | <i>Nanoscale</i> 2014, 6, 12856                    |
| N, P-doped Mo <sub>2</sub> C@C                                             | 0.9  | 10  | 141 | 0.5 M H <sub>2</sub> SO <sub>4</sub> | <i>ACS Nano</i> 2016, 10, 9, 8851.                 |
| MoS <sub>x</sub> @Mo <sub>2</sub> C                                        | 0.21 | 178 | 400 | 0.5 M H <sub>2</sub> SO <sub>4</sub> | <i>ACS Catal.</i> 2015, 5, 6956.                   |
| MoC–Mo <sub>2</sub> C                                                      | 0.14 | 10  | 126 | 0.5 M H <sub>2</sub> SO <sub>4</sub> | <i>Chem. Sci.</i> 2016, 7, 3399.                   |
| MoS <sub>2</sub> /Mo <sub>2</sub> CTx                                      | NA   | 10  | 112 | 1 M KOH                              | <i>Nanoscale</i> , 2019, 11, 10992                 |
| Mo <sub>2</sub> CTx/2H-MoS <sub>2</sub>                                    | NA   | 10  | 119 | 1 M KOH                              | <i>ACS Nano</i> , 2020, 14, 16140                  |
| Mo-Mxene/C/P hybrid                                                        | 0.25 | 10  | 58  | 0.5 M H <sub>2</sub> SO <sub>4</sub> | <b><i>This work</i></b>                            |
